# Supplementary material for: High Diversity, Low Disparity and Small Body Size in Plesiosaurs (Reptilia, Sauropterygia) from the Triassic–Jurassic Boundary
Source: PLoS One. 2012 Mar 16;7(3):e31838. doi: 10.1371/journal.pone.0031838 (PMC3306369; doi:10.1371/journal.pone.0031838)
Supplement: Appendix S1 — Measurements, age, provenance data and lists of specimens examined for taxa included in the phylogenetic analysis. [XLS] [file pone.0031838.s001.xls]

## Sheet: Taxon data
Benson, Evans & Druckenmiller—earliest plesiosaurs (Appendix S2-Taxon data)
Taxon	Numerical age estimate (Ma)	Lengths (mm)			Authority	Locality	Stage	Horizon	Data sources
	(only for taxa in body size analysis)	Trunk	Neck	Skull					Type specimen	Referred specimens	References	CT scan
Augustasaurus hagdorni	-	?			Sander et al 1997	Muller Canyon, Augusta Mountains, southeasternmost Perishing County, Nevada, USA	Anisian	Fossil Hill Member, Favret Formation, Star Peak Group, basal Rotelliformis Zone (late Anisian)	FMNH PR 1974		Sander et al. 1997; Rieppel et al 2002; Druckenmiller & Russell 2008a
?Pistosaurus postcranium	-	?					Anisian				Sues 1987
Pistosaurus skull	-	?					Anisian		UMO uncatalogued		Von Meyer 1847-1855; Sues 1987; Rieppel et al. 2002
Bobosaurus forojuliensis	225	1500			Dalla Vecchia 2006	Eastern Tollomezzo Alps, near Gran Colle village, two kilometres northwest of Dogna, Udine Province, Italy	Carnian	Rio del Lago Formation, Lower Carnian			Dalla Vecchia 2006
Yunguisaurus liae	233	680			Cheng et al. 2006	Near Chajiang, Guizhou Province, China	Ladinian	Lower part of Zhuganpo Formation (Ladinian)			Cheng et al. 2006; Sato et al. 2010
Thalassiodracon hawkinsii	199	680	755	170	(Owen, 1838)	Street, Somerset, UK and Walton, just west of Street	Rhaetian–Hettangian	Pre-Planorbis beds (Rhaetian-?lowermost Hettangian), Blue Lias Formation, Lower Lias Group	NHMUK 2018*	CAMSM J.35181, J.46986; NHMUK 2020*[14551], 2021*, 2022*[14549]; GSM 51235	Hawkins 1834, 1840; Barrett 1858; Storrs & Taylor 1996; Benson et al. 2011	Yes
Stratesaurus taylori	199	?	?	180	gen. et sp. nov.	Street, Somerset, UK	Rhaetian–Hettangian	Pre-Planorbis beds (Rhaetian-?lowermost Hettangian), Blue Lias Formation, Lower Lias Group		GSM 26035, OUMNH J.10337, AGT 11	Conybeare 1922; O'Keefe 2001
Avalonnectes arturi	199	735	>670	?	gen. et sp. nov.	Street, Somerset, UK	Rhaetian–Hettangian	Pre-Planorbis beds (Rhaetian-?lowermost Hettangian), Blue Lias Formation, Lower Lias Group		BMNH 14550, AGT uncatalogued
Eoplesiosaurus antiquior	199	980	>1220	?	gen. et sp. nov.	Street, Somerset, UK	Rhaetian–Hettangian	Pre-Planorbis beds (Rhaetian-?lowermost Hettangian), Blue Lias Formation, Lower Lias Group		TTNCM 8348
Eurycleidus arcuatus	-	?	?	?	(Owen, 1840)	Street, Somerset, UK	Rhaetian–Hettangian	Pre-Planorbis beds (Rhaetian-?lowermost Hettangian), Blue Lias Formation, Lower Lias Group	NHMUK 2030*	NHMUK R1317–9, 2027*–2030*, 2047*, 2061*, probably representing the same individual as the lectotype (Cruickshank 1994)	Hawkins 1834, 1840; Andrews 1922
Macroplata tenuiceps	197	1610	1240	560	Swinton 1930	Harbury Cement Works, Leamington Spa, Warwickshire, UK	Hettangian	Schlotheimia angulata Zone (late Hettangian), Rugby Limestone Member, Blie Lias Formation, Lias Group	NHMUK R5488		Ketchum & Smith 2010	Yes
Rhomaleosaurus megacephalus	199	1820	1321	840	(Stutchbury, 1846)	Barrow-on-Soar, Leicestershire, UK	Hettangian	Bottom Floor Limestone of the planorbis Zone (Hettangian)	LEICS G221.1851		Cruickshank 1994; Smith 2007
NHMUK 49202	-	?	?	345		Lyme Regis	Hettangian–Sinemurian	Lias'		NHMUK 49202	Andrews 1896; Druckenmiller & Russell 2008a
Archaeonectrus rostratus	193	1190	850	585	(Owen, 1865-1881)	Charmouth, Dorset, UK	Hettangian–Sinemurian	Lower Lias'	NHMUK 38525	Owen referred an additional specimen (NHMUK XXX) that is not used here	Owen 1865-1881; Smith 2007
Eretmosaurus rugosus	193	1190	?	?	(Owen, 1865-1881)	Near Grandby, Leicestershire	Sinemurian	Lower Lias'; Ammonites stellaris (?=Asteroceras obtusum) (Sinemurian) CHECK	NHMUK 14435		Owen 1865–1881
Attenborosaurus conybeari	193	1340	2108	502	(Sollas, 1881)	Northwest corner of Blackven Water, 0.5 miles west of the river Char, Dorset	Sinemurian	Lower Lias, 7 feet above the 'boulder bed', Ammonites obtusus (Sinemurian; Gradstein et al 2005)		Cast of holotype, NHMUK R1338, R1339	Sollas 1881; Swinton 1948
Plesiosaurus dolichodeirus	191	1100	1450	190	De la Beche & Conybeare, 1821	Lyme Regis, Charmouth coastal region, Dorset, UK	Sinemurian	Uppermost Sinemurian, Echioceras raricostatum Zone, Black Ven Marl Formation, Lower Lias	NHMUK 22656	NHMUK 36183, R1313, others	Owen 1865–1881; Storrs 1997
Rhomaleosaurus thorntoni	181.5	3400	>1100	?	Andrews, 1922b	Kingsthorpe, Northamptonshire, UK	Toarcian	Upper Liassic'; Toarcian	NHMUK R4853		Andrews 1922b; Cruickshank 1996; Smith 2007
Meyerasaurus victor	182	1750	1000	360	(Fraas, 1910)	Holzmaden, Baden-Württemberg, Germany	Toarcian	Posidonien-Scheifer, Lias epsilon II, 3 (Unterer Schiefer); Harpoceras serpentinum (formerly falciferum); Toarcian	SMNS 12478		Smith & Vincent 2010
Rhomaleosaurus cramptoni	181	2460	1995	1060	(Carte & Baily 1863)	Kettleness alum works, near Whitby, Yorkshire, UK	Toarcian	Whitby Mudstone Formation; bifrons Zone; Toarcian	NHMUK cast of holotype: NMING F8785		Smith 2007; Smith & Dyke 2008
Microcleidus homalospondylus	181	1340	2000	280	(Owen 1865–1881)	Whitby	Toarcian	Upper Lias' or 'Alum Shale' of Whitby (Owen 1865–1881; YORYM and NHMUK specimens); D. commune Zone of the Yorshire coast (Watson 1909); MMUM LL 7077 from Whitby [100 yards from a site at Saltwick Bay] (Watson 1909)	NHMUK 36184	MMUM LL 7135, YYY; YORYM XXX	Owen 1865–1881; Watson 1909
Seelyosaurus guilelmiimperatoris	182	900	1300	170	(Dames, 1895)	Holzmaden, Baden-Württemberg, Germany	Toarcian	Lias epsilon II4; Harpoceras sepentinum Zone; Toarcian	MB.R. 1992 (based on Dames 1895)	SMNS 12039 based on Fraas (1910). Although Großmann (2007) referred the holotype of Plesiopterys wildi (SMNS 16812) to Seeleyosaurus guilelmiimperatoris, the specimens figured by Dames (1895) and Fraas (1910) both possess c.34 cervical vertebrae that are only slightly longer anteroposteriorly than high dorsoventrally (contra Großmann 2007; based on figures in Dames 1895 and Fraas 1910), whereas P…	Dames 1895; Fraas 1910; Großmann 2007
Plesiopterys wildi	-	770	865	148	O'Keefe, 2004	Holzmaden, Baden-Württemberg, Germany	Toarcian	Lias epsilon II4; Harpoceras sepentinum Zone; Toarcian	SMNS 16812		O'Keefe 2004; Großmann 2007
Hauffiosaurus tomistomimus	181	1350	1350	>420	Benson et al., 2011	Bay between Old Pek and Blea Wyke Point, south-east of Robin Hood's Bay, Yorkshire, UK	Toarcian	Hildoceras bifrons Zone, Alum Shale Member, Whitby Mudstone Formation (lower Toarcian)	MANCH LL 8004		Broadhurst & Duffy 1970; Cruickshank 1996; O'Keefe 2001; Benson et al. 2011
Hauffiosaurus longirostris	182	2030	1800	680	(Blake in Tate & Blake, 1876)	Near Whitby, Yorkshire, UK	Toarcian	Haroceras serpentinum (look up in Benton & Taylor 1984)	MCZ 1033		White 1940
Rhomaleosaurus zetlandicus	-	1800	1300	740	(Phillips in Anon, 1854)	Loftus (or 'Lofthouse') Alum Mine, 2km northeast of Loftus, Yorkshire, UK	Toarcian	Upper or Middle Alum Shale Member, Whitby Mudstone Formation; Hildoceras bifroms Zone	YORYM G503		Taylor 1992; Smith 2007
Hydrorion brachypterygius	182	890	1180	200	(von Huene, 1923)	Ohmden, near Holzmaden, Baden-Württemberg, Germany	Toarcian	Lias epsilon II4; Harpoceras sepentinum Zone; Toarcian		SMNS 51143	Von Huene 1923; Maisch & Rucklin 2000; Großmann 2007
Occitanosaurus tournemirensis	176	975	1860	250	(Sciau et al., 1990)	Near Tournemire, Aveyron Department, France	Toarcian	Marnes feuilletées, Pleydellia celtica Subzone; Toarcian	MMM J. T. 86-100		Bardet et al. 1999
Hauffiosaurus zanoni	182	1160	1000	410	O'Keefe, 2001	Holzmaden, Baden-Württemberg, Germany	Toarcian	Lias epsilon II4; Harpoceras sepentinum Zone; Toarcian	HAUF uncatalogued		O'Keefe 2001; Vincent 2011
Maresaurus coccai	-	-	-	-	Gasparini, 1997	Chacaico Sur, 70 km south-west of Zapala, Neuquén Province, Argentina	Bajocian	Upper part of Los Molles Formation, Cuyo Group: Emileia giebeli, Emileia multiformis subzone (Lower Bajocian)			Gasparini 1997
Cryptoclidus eurymerus	-	-	-	-	(Phillips, 1871)	Around Bedford and Peterborough, UK	Callovian	Peterborough Member, Oxford Clay Formation; Callovian	NHMUK R.2860		Andrews 1910; Brown 1981; Brown & Cruickshank 1994
Peloneustes philarchus	-	-	-	-	(Seeley, 1869)	Around Bedford and Peterborough, UK	Callovian	Peterborough Member, Oxford Clay Formation; Callovian	CAMSM J.46913	Numerous specimens listed by Ketchum & Benson 2011	Andrews 1913; Linder 1913; Tarlo 1960; Ketchum 2007; Ketchum & Benson 2011
