# Supplementary material for: High Diversity, Low Disparity and Small Body Size in Plesiosaurs (Reptilia, Sauropterygia) from the Triassic–Jurassic Boundary
Source: PubMed Central journal article supplement (PMC3306369; doi:10.1371/journal.pone.0031838), 2012-03-16
Supplement: pone.0031838.s003.pdf [file pone.0031838.s003.pdf]

|                                  | 1  | 2  | 3  | 4    | 5  | 6  | 7  | 8  | 9  | 10 | 11 | 12 | 13 | 14 | 15 | 16 |
|----------------------------------|----|----|----|------|----|----|----|----|----|----|----|----|----|----|----|----|
| <i>Yunguisaurus</i>              | 0  | 0  | 0  | 0    | 0  | 0  | ?  | ?  | 0  | 0  | 0  | 0  | 0  | 0  | 0  | 0  |
| <i>Pistosaurus</i> [postcranium] | ?  | ?  | ?  | ?    | ?  | ?  | ?  | ?  | ?  | ?  | ?  | ?  | ?  | ?  | ?  | ?  |
| <i>Pistosaurus</i> [skull]       | 0  | 1  | 0  | 1    | 0  | ?  | 0  | 0  | 0  | 0  | 0  | 0  | 0  | 0  | 0  | 0  |
| <i>Augustasaurus</i>             | 0  | 1  | 0  | 1    | 0  | ?  | 0  | 0  | 0  | 0  | ?  | 0  | 0  | 0  | 0  | 0  |
| <i>Bobosaurus</i>                | ?  | ?  | ?  | ?    | ?  | ?  | ?  | ?  | ?  | ?  | ?  | ?  | ?  | ?  | ?  | 0  |
| NHMUK_49202                      | 1  | 1  | 1  | 0    | 0  | ?  | 0  | 1  | 2  | 0  | ?  | 0  | 0  | 0  | 2  | 1  |
| <i>Stratesaurus</i>              | 0  | 0  | 1  | 0    | 0  | 0  | 0  | 1  | 1  | 0  | 1  | 0  | 0  | 1  | 0  | 0  |
| <i>Macroplata</i>                | 1  | 1  | 0  | 1    | 0  | 0  | ?  | ?  | 0  | 0  | ?  | 1  | 0  | 1  | 0  | 1  |
| <i>Avalonnectes</i>              | ?  | ?  | 1  | ?    | ?  | 0  | ?  | ?  | ?  | 0  | 1  | ?  | ?  | 1  | 0  | ?  |
| <i>Eurycleidus</i>               | ?  | ?  | ?  | ?    | ?  | ?  | ?  | ?  | ?  | ?  | ?  | ?  | ?  | ?  | ?  | ?  |
| <i>Meyerasaurus</i>              | 1  | 0  | 1  | 0    | ?  | 0  | ?  | 2  | 0  | ?  | ?  | 0  | 2  | ?  | ?  | 1  |
| <i>Maresaurus</i>                | 1  | 1  | 0  | 0    | 0  | ?  | 1  | 2  | 2  | 0  | ?  | 1  | 2  | ?  | ?  | 1  |
| 'R.' <i>megacephalus</i>         | 1  | 0  | 0  | 0    | 1  | 1  | 1  | 2  | 2  | 0  | 0  | 1  | 2  | 1  | 0  | 1  |
| <i>Archaeonectrus</i>            | 1  | 0  | 0  | 1    | 0  | 1  | ?  | ?  | ?  | 0  | ?  | 1  | 0  | 2  | ?  | 1  |
| <i>R. cramptoni</i>              | 1  | 0  | 0  | 0    | 0  | 1  | 1  | 2  | 2  | 0  | ?  | 1  | 0  | 2  | 0  | 1  |
| <i>R. zetlandicus</i>            | 1  | 1  | 0  | 0    | ?  | 1  | 1  | 2  | 2  | 0  | ?  | 1  | 0  | 2  | 0  | 1  |
| <i>R. thornptoni</i>             | 1  | 1  | ?  | ?    | ?  | ?  | ?  | 2  | ?  | 0  | ?  | 1  | 0  | ?  | ?  | 1  |
| <i>Thalassiodracon</i>           | 0  | 0  | 1  | 0    | 0  | 0  | 1  | 1  | 0  | 0  | 1  | 0  | 0  | 1  | 1  | 1  |
| <i>H. longirostris</i>           | 0  | 0  | 0  | 1    | ?  | 0  | 0  | ?  | 0  | ?  | ?  | 1  | 2  | 1  | 1  | 1  |
| <i>H. tomistomimus</i>           | 0  | 0  | 0  | 1    | ?  | 0  | 0  | 2  | 0  | 0  | ?  | 1  | ?  | 1  | 1  | 0  |
| <i>H. zanoni</i>                 | 0  | 0  | ?  | 1    | ?  | 0  | ?  | ?  | 0  | ?  | ?  | ?  | ?  | ?  | ?  | ?  |
| <i>Attenborosaurus</i>           | 0  | 0  | 0  | 1    | 0  | 0  | 0  | ?  | ?  | ?  | 1  | 1  | 0  | ?  | ?  | 1  |
| <i>Peloneustes</i>               | 1  | 0  | 0  | 1    | 1  | 1  | 0  | 2  | 0  | 1  | 0  | 0  | 0  | 2  | 1  | 0  |
| <i>Eoplesiosaurus</i>            | ?  | ?  | ?  | ?    | ?  | ?  | ?  | ?  | ?  | ?  | ?  | ?  | ?  | ?  | ?  | ?  |
| <i>Plesiosaurus</i>              | 0  | 0  | 1  | 0    | 0  | ?  | 0  | 1  | 0  | 0  | ?  | 0  | 0  | 1  | 0  | 0  |
| <i>Eretmosaurus</i>              | ?  | ?  | ?  | ?    | ?  | ?  | ?  | ?  | ?  | ?  | ?  | ?  | ?  | ?  | ?  | ?  |
| <i>Westphaliasaurus</i>          | ?  | ?  | ?  | ?    | ?  | ?  | ?  | ?  | ?  | ?  | ?  | ?  | ?  | ?  | ?  | ?  |
| <i>Seelyosaurus</i>              | 0  | 0  | 1  | 0    | ?  | 0  | 0  | ?  | 0  | 0  | ?  | 0  | 2  | ?  | ?  | ?  |
| <i>M.tournemirensis</i>          | 0  | 0  | 0  | 0    | 0  | 0  | ?  | 1  | 2  | 0  | 1  | 0  | 2  | 1  | 0  | 0  |
| <i>M. brachypterygius</i>        | 0  | 0  | 0  | 0    | 0  | 0  | ?  | 1  | 0  | 0  | 1  | 0  | 2  | 1  | 0  | 0  |
| <i>M. homalospondylus</i>        | 0  | 0  | 0  | 0    | 0  | 0  | 0  | 1  | 0  | 0  | 1  | 0  | 2  | 1  | 0  | ?  |
| <i>Plesiospterys</i>             | 0  | 0  | 1  | 0    | ?  | 0  | ?  | 1  | ?  | ?  | ?  | 0  | 0  | ?  | ?  | ?  |
| <i>Cryptoclidus</i>              | 0  | 0  | 1  | 0    | ?  | 0  | 0  | 1  | 1  | ?  | 1  | 0  | ?  | 1  | 0  | 0  |
|                                  | 17 | 18 | 19 | 20   | 21 | 22 | 23 | 24 | 25 | 26 | 27 | 28 | 29 | 30 | 31 | 32 |
| <i>Yunguisaurus</i>              | ?  | ?  | 0  | 0    | 1  | 0  | 0  | ?  | 0  | 0  | 1  | 1  | 0  | 0  | 1  | ?  |
| <i>Pistosaurus</i> [postcranium] | ?  | ?  | ?  | ?    | ?  | ?  | ?  | ?  | ?  | ?  | ?  | ?  | ?  | ?  | ?  | ?  |
| <i>Pistosaurus</i> [skull]       | ?  | ?  | 0  | 0    | 1  | 0  | 0  | 0  | 0  | 0  | 1  | ?  | 1  | 0  | 0  | 0  |
| <i>Augustasaurus</i>             | ?  | ?  | 0  | 0    | 1  | 0  | 0  | 0  | 0  | 0  | 1  | 0  | 0  | 0  | 0  | 0  |
| <i>Bobosaurus</i>                | ?  | ?  | ?  | ?    | ?  | ?  | ?  | ?  | ?  | ?  | ?  | ?  | ?  | ?  | ?  | ?  |
| NHMUK_49202                      | 0  | 0  | 0  | 0    | 1  | 0  | ?  | 0  | 1  | 0  | 1  | 0  | 1  | 0  | 0  | 0  |
| <i>Stratesaurus</i>              | ?  | ?  | 0  | 1    | 1  | 0  | 0  | 0  | 0  | 1  | 0  | 0  | ?  | 0  | ?  | 0  |
| <i>Macroplata</i>                | 1  | 1  | 0  | {02} | ?  | 0  | 0  | ?  | 1  | 1  | 1  | 0  | 1  | 0  | ?  | ?  |
| <i>Avalonnectes</i>              | ?  | ?  | ?  | ?    | ?  | ?  | 0  | ?  | ?  | ?  | 0  | 0  | 1  | ?  | ?  | 0  |
| <i>Eurycleidus</i>               | ?  | ?  | ?  | ?    | ?  | ?  | ?  | ?  | ?  | ?  | ?  | ?  | ?  | ?  | ?  | ?  |
| <i>Meyerasaurus</i>              | 1  | ?  | ?  | 0    | 1  | 0  | ?  | 0  | 0  | ?  | ?  | ?  | ?  | 0  | ?  | ?  |
| <i>Maresaurus</i>                | 1  | 2  | 0  | {02} | 1  | 0  | 0  | 0  | ?  | ?  | ?  | ?  | ?  | ?  | ?  | ?  |
| 'R.' <i>megacephalus</i>         | 0  | 0  | 0  | 2    | 1  | 0  | 0  | 0  | 1  | ?  | 1  | 0  | 0  | 0  | ?  | 0  |
| <i>Archaeonectrus</i>            | 1  | 1  | 1  | ?    | ?  | 0  | ?  | ?  | ?  | ?  | 0  | ?  | ?  | 0  | ?  | 0  |
| <i>R. cramptoni</i>              | 0  | 0  | 1  | 2    | 1  | 1  | 0  | 0  | 0  | 1  | 0  | ?  | 1  | 0  | 0  | 0  |
| <i>R. zetlandicus</i>            | 0  | 0  | 1  | 2    | 1  | 1  | ?  | 0  | 0  | 1  | 0  | ?  | ?  | 0  | 0  | ?  |
| <i>R. thornptoni</i>             | 0  | 2  | 1  | ?    | 1  | 1  | 0  | 0  | 0  | ?  | ?  | ?  | ?  | 0  | ?  | 0  |
| <i>Thalassiodracon</i>           | 1  | 2  | 0  | ?    | ?  | 0  | 0  | 0  | 0  | ?  | 0  | 0  | 0  | 0  | 0  | 0  |
| <i>H. longirostris</i>           | 1  | 2  | 0  | ?    | ?  | 0  | ?  | ?  | 2  | ?  | ?  | ?  | ?  | ?  | ?  | ?  |
| <i>H. tomistomimus</i>           | ?  | ?  | 0  | 1    | 0  | 0  | 2  | 0  | 2  | 1  | 0  | 0  | 0  | 1  | 0  | ?  |
| <i>H. zanoni</i>                 | ?  | ?  | ?  | ?    | ?  | ?  | 2  | 0  | ?  | ?  | ?  | ?  | ?  | ?  | ?  | ?  |
| <i>Attenborosaurus</i>           | 1  | 2  | ?  | ?    | ?  | 0  | 0  | ?  | 0  | ?  | ?  | ?  | ?  | 0  | ?  | 0  |
| <i>Peloneustes</i>               | ?  | ?  | 0  | 1    | 0  | 0  | 2  | 0  | 0  | 1  | 0  | ?  | 0  | 1  | 0  | 0  |
| <i>Eoplesiosaurus</i>            | ?  | ?  | ?  | ?    | ?  | ?  | ?  | ?  | ?  | ?  | ?  | ?  | ?  | ?  | ?  | ?  |
| <i>Plesiosaurus</i>              | ?  | ?  | 0  | 0    | 1  | 0  | 0  | ?  | 0  | 0  | 0  | 1  | 0  | 0  | 1  | 0  |
| <i>Eretmosaurus</i>              | ?  | ?  | ?  | ?    | ?  | ?  | ?  | ?  | ?  | ?  | ?  | ?  | ?  | ?  | ?  | ?  |
| <i>Westphaliasaurus</i>          | ?  | ?  | ?  | ?    | ?  | ?  | ?  | ?  | ?  | ?  | ?  | ?  | ?  | ?  | ?  | ?  |
| <i>Seelyosaurus</i>              | ?  | ?  | 0  | ?    | ?  | ?  | ?  | ?  | 0  | ?  | ?  | ?  | ?  | 0  | ?  | 0  |
| <i>M.tournemirensis</i>          | ?  | ?  | 0  | 0    | 1  | 0  | 0  | 0  | 0  | 0  | 0  | 0  | 0  | 0  | 1  | 1  |
| <i>M. brachypterygius</i>        | ?  | ?  | 0  | 0    | 1  | 0  | 0  | 0  | 0  | 0  | 0  | 0  | 1  | 0  | 1  | 1  |
| <i>M. homalospondylus</i>        | ?  | ?  | 0  | 0    | 1  | 0  | 1  | ?  | 0  | ?  | 0  | 0  | 1  | 0  | ?  | 1  |
| <i>Plesiospterys</i>             | ?  | ?  | ?  | ?    | ?  | 0  | ?  | ?  | 0  | ?  | 0  | 1  | ?  | 0  | ?  | ?  |
| <i>Cryptoclidus</i>              | ?  | ?  | 0  | 0    | 1  | 0  | 0  | 1  | 0  | 0  | 0  | 1  | 0  | 0  | 0  | 0  |

|                                  | 33   | 34   | 35 | 36 | 37 | 38 | 39 | 40 | 41 | 42 | 43 | 44 | 45 | 46 | 47 | 48 |   |
|----------------------------------|------|------|----|----|----|----|----|----|----|----|----|----|----|----|----|----|---|
| <i>Yunguisaurus</i>              | 0    | 0    | 0  | 1  | ?  | ?  | 1  | 0  | 0  | ?  | ?  | ?  | ?  | ?  | 0  | 1  |   |
| <i>Pistosaurus</i> [postcranium] | ?    | ?    | ?  | ?  | ?  | ?  | ?  | ?  | ?  | ?  | ?  | ?  | ?  | ?  | ?  | ?  |   |
| <i>Pistosaurus</i> [skull]       | 0    | 0    | 0  | 0  | 0  | 1  | 1  | 0  | 0  | ?  | ?  | ?  | ?  | 0  | 0  | 1  |   |
| <i>Augustasaurus</i>             | 0    | 0    | ?  | 0  | 0  | 1  | 1  | 1  | 0  | 0  | 1  | 0  | ?  | ?  | ?  | ?  |   |
| <i>Bobosaurus</i>                | ?    | ?    | ?  | ?  | ?  | ?  | ?  | ?  | ?  | ?  | ?  | ?  | ?  | ?  | ?  | ?  |   |
| NHMUK_49202                      | 0    | ?    | 0  | 0  | 1  | 1  | 1  | 0  | 0  | ?  | 1  | 0  | ?  | 0  | 1  | 1  |   |
| <i>Stratesaurus</i>              | 0    | 0    | 0  | 0  | 0  | 1  | 0  | 0  | 0  | 0  | 1  | 0  | 1  | 0  | 1  | 1  |   |
| <i>Macroplata</i>                | ?    | ?    | ?  | 0  | ?  | ?  | ?  | ?  | 0  | ?  | ?  | ?  | ?  | ?  | 0  | 1  |   |
| <i>Avalonnectes</i>              | 0    | 0    | 0  | 0  | 0  | 1  | 0  | 0  | 0  | 0  | 1  | 0  | 1  | 0  | ?  | ?  |   |
| <i>Eurycleidus</i>               | ?    | ?    | ?  | ?  | ?  | ?  | ?  | ?  | ?  | ?  | ?  | ?  | ?  | ?  | ?  | ?  |   |
| <i>Meyerasaurus</i>              | ?    | ?    | ?  | ?  | ?  | ?  | ?  | ?  | ?  | ?  | ?  | 0  | 1  | 0  | 1  | ?  |   |
| <i>Maresaurus</i>                | ?    | ?    | ?  | 0  | 1  | 1  | 1  | 0  | ?  | ?  | 1  | 0  | ?  | 0  | 1  | 1  |   |
| 'R.' <i>megacephalus</i>         | 0    | 0    | 0  | 0  | 0  | 1  | 1  | 0  | 0  | 1  | 1  | 0  | 1  | 0  | 1  | ?  |   |
| <i>Archaeonectrus</i>            | 0    | ?    | 0  | 0  | 0  | 1  | 1  | 0  | 1  | ?  | 1  | ?  | ?  | 0  | 1  | ?  |   |
| <i>R. cramptoni</i>              | 0    | 0    | 0  | 0  | 0  | 1  | 1  | 0  | 1  | 1  | 1  | 1  | 1  | 0  | ?  | 1  |   |
| <i>R. zetlandicus</i>            | ?    | ?    | ?  | 0  | 0  | 1  | ?  | 0  | 1  | ?  | 1  | 1  | 1  | 0  | 1  | 1  |   |
| <i>R. thorntoni</i>              | 0    | 0    | 0  | ?  | ?  | ?  | ?  | ?  | ?  | 1  | ?  | ?  | ?  | ?  | ?  | ?  |   |
| <i>Thalassiodracon</i>           | 0    | ?    | 2  | 0  | 0  | 0  | 0  | 0  | 1  | 0  | 1  | 0  | 1  | 1  | 0  | 1  |   |
| <i>H. longirostris</i>           | ?    | ?    | ?  | ?  | ?  | 0  | 1  | ?  | ?  | ?  | ?  | ?  | ?  | ?  | 0  | 1  |   |
| <i>H. tomistomimus</i>           | ?    | ?    | ?  | ?  | 0  | 0  | 0  | 0  | 1  | ?  | 1  | 0  | 1  | ?  | 0  | 1  |   |
| <i>H. zanoni</i>                 | 0    | ?    | ?  | ?  | ?  | ?  | ?  | ?  | ?  | 0  | 1  | ?  | ?  | ?  | 0  | 1  |   |
| <i>Attenborosaurus</i>           | 0    | 0    | 2  | ?  | ?  | ?  | 1  | ?  | ?  | 0  | ?  | ?  | ?  | 1  | 1  | ?  |   |
| <i>Peloneustes</i>               | 0    | 0    | 2  | 0  | 0  | 0  | 2  | 1  | 2  | 0  | 1  | 0  | ?  | 0  | 0  | 1  |   |
| <i>Eoplesiosaurus</i>            | ?    | ?    | ?  | ?  | ?  | ?  | ?  | ?  | ?  | ?  | ?  | ?  | ?  | ?  | ?  | ?  |   |
| <i>Plesiosaurus</i>              | 0    | 0    | ?  | 0  | 0  | 0  | 0  | 0  | 0  | 1  | 0  | 1  | 0  | 1  | 1  | 1  |   |
| <i>Eretmosaurus</i>              | ?    | ?    | ?  | ?  | ?  | ?  | ?  | ?  | ?  | ?  | ?  | ?  | ?  | ?  | ?  | ?  |   |
| <i>Westphaliasaurus</i>          | ?    | ?    | ?  | ?  | ?  | ?  | ?  | ?  | ?  | ?  | ?  | ?  | ?  | ?  | ?  | ?  |   |
| <i>Seelyosaurus</i>              | 0    | 1    | 1  | ?  | 1  | ?  | 0  | ?  | 0  | ?  | 0  | ?  | ?  | 1  | 1  | ?  |   |
| <i>M. tournemirensis</i>         | 1    | 1    | 1  | 0  | 0  | 0  | 1  | 0  | 0  | 1  | 1  | 0  | 0  | 1  | ?  | ?  |   |
| <i>M. brachypterygius</i>        | 1    | 1    | 1  | 0  | 1  | 0  | 1  | 0  | 0  | 1  | 0  | 0  | ?  | ?  | ?  | ?  |   |
| <i>M. homalospondylus</i>        | 1    | 1    | 1  | 0  | 1  | 0  | 1  | 0  | 0  | 1  | ?  | ?  | ?  | 1  | 1  | 1  |   |
| <i>Plesiospterys</i>             | ?    | ?    | ?  | 1  | 0  | 0  | 0  | 0  | 0  | ?  | 0  | 0  | ?  | 0  | ?  | 1  |   |
| <i>Cryptoclidus</i>              | 2    | 0    | 2  | 1  | 1  | 0  | 0  | 1  | 0  | 0  | 0  | 0  | 0  | 0  | 1  | 0  |   |
|                                  | 49   | 50   | 51 | 52 | 53 | 54 | 55 | 56 | 57 | 58 | 59 | 60 | 61 | 62 | 63 | 64 |   |
| <i>Yunguisaurus</i>              | 2    | 0    | ?  | ?  | ?  | ?  | ?  | ?  | ?  | ?  | ?  | ?  | ?  | ?  | 0  | 2  | ? |
| <i>Pistosaurus</i> [postcranium] | ?    | ?    | ?  | ?  | ?  | ?  | ?  | ?  | ?  | ?  | ?  | ?  | ?  | ?  | ?  | ?  |   |
| <i>Pistosaurus</i> [skull]       | ?    | 0    | ?  | ?  | ?  | ?  | ?  | ?  | ?  | ?  | ?  | ?  | ?  | 0  | 2  | ?  |   |
| <i>Augustasaurus</i>             | ?    | 0    | ?  | ?  | 0  | ?  | 0  | 0  | 0  | ?  | ?  | ?  | ?  | ?  | 0  | 2  | ? |
| <i>Bobosaurus</i>                | ?    | ?    | ?  | ?  | ?  | ?  | ?  | ?  | ?  | ?  | ?  | ?  | ?  | ?  | ?  | ?  |   |
| NHMUK_49202                      | 2    | 0    | 0  | 1  | 1  | 1  | 1  | 1  | 1  | 0  | 0  | 1  | 0  | 0  | 0  | 2  |   |
| <i>Stratesaurus</i>              | 1    | 1    | 2  | 0  | 0  | 2  | 0  | 0  | 0  | ?  | 0  | 0  | 0  | 0  | 2  | 2  |   |
| <i>Macroplata</i>                | 1    | 2    | ?  | 0  | 1  | 2  | ?  | 1  | 0  | ?  | 0  | 1  | ?  | 0  | 0  | 2  |   |
| <i>Avalonnectes</i>              | ?    | ?    | ?  | ?  | ?  | ?  | ?  | ?  | ?  | ?  | ?  | ?  | ?  | ?  | ?  | ?  |   |
| <i>Eurycleidus</i>               | ?    | ?    | ?  | ?  | ?  | ?  | ?  | ?  | ?  | ?  | ?  | ?  | ?  | ?  | ?  | ?  |   |
| <i>Meyerasaurus</i>              | {01} | 1    | ?  | ?  | ?  | ?  | ?  | ?  | ?  | ?  | ?  | ?  | ?  | 0  | 2  | 2  |   |
| <i>Maresaurus</i>                | ?    | 2    | ?  | ?  | ?  | ?  | 0  | ?  | ?  | ?  | ?  | ?  | ?  | 0  | ?  | ?  |   |
| 'R.' <i>megacephalus</i>         | ?    | {12} | 2  | 0  | 1  | ?  | 0  | 0  | 0  | ?  | 0  | ?  | ?  | 0  | 0  | 2  |   |
| <i>Archaeonectrus</i>            | ?    | ?    | ?  | ?  | ?  | ?  | ?  | ?  | ?  | ?  | ?  | ?  | ?  | ?  | ?  | ?  |   |
| <i>R. cramptoni</i>              | ?    | ?    | ?  | ?  | 1  | ?  | 0  | 0  | 0  | ?  | ?  | ?  | ?  | 0  | 2  | ?  |   |
| <i>R. zetlandicus</i>            | ?    | ?    | ?  | ?  | 1  | ?  | 0  | ?  | 0  | ?  | ?  | ?  | ?  | ?  | 2  | 2  |   |
| <i>R. thorntoni</i>              | ?    | ?    | ?  | ?  | ?  | ?  | ?  | ?  | ?  | ?  | ?  | ?  | ?  | ?  | ?  | ?  |   |
| <i>Thalassiodracon</i>           | 1    | 1    | 0  | 0  | 0  | 2  | 0  | 0  | 0  | 1  | 0  | 0  | 0  | 0  | ?  | 0  |   |
| <i>H. longirostris</i>           | 0    | 2    | ?  | 0  | ?  | ?  | ?  | 1  | ?  | ?  | ?  | ?  | ?  | 1  | ?  | 0  |   |
| <i>H. tomistomimus</i>           | 1    | 2    | ?  | ?  | ?  | ?  | ?  | 1  | 0  | ?  | ?  | ?  | ?  | 1  | ?  | 0  |   |
| <i>H. zanoni</i>                 | ?    | ?    | ?  | ?  | ?  | ?  | ?  | ?  | ?  | ?  | ?  | ?  | ?  | ?  | ?  | 0  |   |
| <i>Attenborosaurus</i>           | ?    | ?    | ?  | ?  | ?  | ?  | ?  | ?  | ?  | ?  | ?  | ?  | ?  | ?  | 2  | ?  |   |
| <i>Peloneustes</i>               | 1    | 1    | 0  | 0  | 1  | 0  | 0  | 0  | 0  | 1  | ?  | 1  | 0  | 0  | 2  | 2  |   |
| <i>Eoplesiosaurus</i>            | ?    | ?    | ?  | ?  | ?  | ?  | ?  | ?  | ?  | ?  | ?  | ?  | ?  | ?  | ?  | ?  |   |
| <i>Plesiosaurus</i>              | {01} | 1    | 0  | ?  | 0  | 2  | 0  | 0  | 0  | 1  | 1  | 1  | ?  | 0  | ?  | 0  |   |
| <i>Eretmosaurus</i>              | ?    | ?    | ?  | ?  | ?  | ?  | ?  | ?  | ?  | ?  | ?  | ?  | ?  | ?  | ?  | ?  |   |
| <i>Westphaliasaurus</i>          | ?    | ?    | ?  | ?  | ?  | ?  | ?  | ?  | ?  | ?  | ?  | ?  | ?  | ?  | ?  | ?  |   |
| <i>Seelyosaurus</i>              | ?    | ?    | ?  | ?  | ?  | ?  | ?  | ?  | ?  | ?  | ?  | ?  | ?  | ?  | ?  | ?  |   |
| <i>M. tournemirensis</i>         | 2    | 2    | ?  | ?  | ?  | ?  | 0  | 0  | 0  | ?  | ?  | ?  | 0  | 1  | 2  | ?  |   |
| <i>M. brachypterygius</i>        | 1    | {12} | ?  | ?  | ?  | ?  | ?  | ?  | ?  | ?  | ?  | ?  | ?  | 0  | 1  | ?  |   |
| <i>M. homalospondylus</i>        | 1    | 2    | 0  | 1  | 0  | 2  | 0  | 0  | 0  | ?  | ?  | 0  | 0  | 0  | 2  | 1  |   |
| <i>Plesiospterys</i>             | 1    | 0    | 1  | 1  | 0  | 2  | 0  | 0  | 0  | 0  | 1  | 0  | 0  | 0  | 1  | 1  |   |
| <i>Cryptoclidus</i>              | 1    | 0    | 1  | 1  | 0  | 0  | 1  | 0  | 1  | 1  | 0  | 1  | 0  | 1  | 0  | 1  |   |

|                                  | 65 | 66 | 67 | 68 | 69 | 70 | 71 | 72   | 73 | 74 | 75 | 76 | 77 | 78 | 79 | 80 |
|----------------------------------|----|----|----|----|----|----|----|------|----|----|----|----|----|----|----|----|
| <i>Yunguisaurus</i>              | 0  | ?  | ?  | ?  | ?  | ?  | ?  | ?    | 0  | ?  | 0  | 0  | 1  | 0  | 0  | 2  |
| <i>Pistosaurus</i> [postcranium] | ?  | ?  | ?  | ?  | ?  | ?  | ?  | ?    | ?  | ?  | ?  | ?  | ?  | ?  | ?  | ?  |
| <i>Pistosaurus</i> [skull]       | 0  | 0  | 0  | 0  | 0  | ?  | ?  | 0    | 0  | ?  | 0  | 0  | 1  | 0  | 0  | 2  |
| <i>Augustasaurus</i>             | 0  | 0  | 0  | ?  | 0  | 1  | 1  | 0    | 0  | ?  | 0  | 0  | 1  | 0  | 0  | 0  |
| <i>Bobosaurus</i>                | ?  | ?  | ?  | ?  | ?  | ?  | ?  | ?    | ?  | ?  | ?  | ?  | ?  | ?  | ?  | ?  |
| NHMUK_49202                      | 1  | ?  | 1  | 0  | 0  | 0  | ?  | 0    | 1  | 1  | ?  | 0  | 0  | ?  | 0  | 0  |
| <i>Stratesaurus</i>              | 1  | ?  | ?  | ?  | 0  | 0  | 1  | 0    | 1  | 0  | 1  | 1  | 0  | ?  | 0  | 0  |
| <i>Macroplata</i>                | 1  | ?  | ?  | ?  | ?  | ?  | ?  | ?    | ?  | ?  | 1  | 0  | 0  | ?  | ?  | 0  |
| <i>Avalonnectes</i>              | ?  | ?  | ?  | ?  | ?  | ?  | ?  | ?    | ?  | ?  | ?  | ?  | ?  | ?  | ?  | ?  |
| <i>Eurycleidus</i>               | ?  | ?  | ?  | ?  | ?  | ?  | ?  | ?    | ?  | ?  | ?  | ?  | ?  | ?  | ?  | ?  |
| <i>Meyerasaurus</i>              | 0  | ?  | 1  | ?  | 0  | 1  | 0  | 1    | 1  | 1  | 1  | 2  | 3  | ?  | 1  | 1  |
| <i>Maresaurus</i>                | 1  | ?  | 0  | 0  | 0  | 1  | 0  | 1    | 0  | ?  | 1  | 2  | 3  | ?  | 1  | 0  |
| 'R.' megacephalus                | 1  | 1  | 0  | 0  | 0  | 1  | 0  | 0    | 1  | 0  | 1  | 1  | ?  | ?  | ?  | 0  |
| <i>Archaeonectrus</i>            | ?  | ?  | ?  | ?  | ?  | ?  | ?  | ?    | ?  | ?  | ?  | ?  | ?  | ?  | ?  | ?  |
| <i>R. cramptoni</i>              | 1  | 1  | 0  | 1  | 0  | 1  | 0  | 1    | 1  | 0  | 1  | 2  | 3  | ?  | 1  | 0  |
| <i>R. zetlandicus</i>            | 1  | ?  | ?  | 0  | ?  | 1  | ?  | ?    | 1  | ?  | 1  | ?  | 3  | ?  | ?  | 0  |
| <i>R. thorntoni</i>              | ?  | 1  | ?  | ?  | 0  | 1  | ?  | ?    | ?  | ?  | ?  | ?  | ?  | ?  | ?  | ?  |
| <i>Thalassiodracon</i>           | 1  | ?  | 0  | 0  | 0  | 1  | 1  | 0    | ?  | ?  | 1  | 0  | 0  | ?  | 0  | 0  |
| <i>H. longirostris</i>           | ?  | ?  | ?  | ?  | ?  | ?  | ?  | ?    | ?  | ?  | 1  | 1  | 0  | ?  | 0  | 1  |
| <i>H. tomistomimus</i>           | 1  | ?  | 0  | ?  | 0  | 1  | 0  | 0    | 0  | ?  | 1  | 0  | 0  | ?  | 0  | 1  |
| <i>H. zanoni</i>                 | 1  | 0  | 1  | ?  | 0  | 1  | 0  | 0    | 0  | ?  | 1  | 0  | 0  | ?  | 0  | 1  |
| <i>Attenborosaurus</i>           | ?  | ?  | ?  | ?  | ?  | ?  | ?  | ?    | ?  | ?  | ?  | ?  | ?  | ?  | ?  | ?  |
| <i>Peloneustes</i>               | 1  | 1  | 0  | 0  | 1  | 1  | 0  | {01} | 0  | ?  | 1  | 2  | 1  | 1  | 0  | 2  |
| <i>Eoplesiosaurus</i>            | ?  | ?  | ?  | ?  | ?  | ?  | ?  | ?    | ?  | ?  | ?  | ?  | ?  | ?  | ?  | ?  |
| <i>Plesiosaurus</i>              | 1  | 0  | 0  | 1  | 0  | 1  | 0  | 0    | 1  | 0  | 1  | 0  | 0  | ?  | 0  | 0  |
| <i>Eretmosaurus</i>              | ?  | ?  | ?  | ?  | ?  | ?  | ?  | ?    | ?  | ?  | ?  | ?  | ?  | ?  | ?  | ?  |
| <i>Westphaliasaurus</i>          | ?  | ?  | ?  | ?  | ?  | ?  | ?  | ?    | ?  | ?  | ?  | ?  | ?  | ?  | ?  | ?  |
| <i>Seelyosaurus</i>              | ?  | ?  | ?  | ?  | ?  | ?  | ?  | ?    | ?  | ?  | ?  | ?  | ?  | ?  | ?  | ?  |
| <i>M. tournemirensis</i>         | 1  | 0  | 0  | 0  | 0  | ?  | ?  | 0    | 0  | ?  | 1  | 2  | 1  | 0  | 0  | 1  |
| <i>M. brachypterygius</i>        | 1  | 0  | 0  | 1  | 0  | 0  | 1  | 0    | 0  | ?  | 1  | 2  | 1  | 0  | 0  | 0  |
| <i>M. homalospondylus</i>        | 1  | ?  | 0  | 0  | ?  | ?  | ?  | ?    | 0  | ?  | ?  | 2  | 1  | 0  | 0  | 1  |
| <i>Plesiospterys</i>             | ?  | ?  | ?  | 1  | ?  | ?  | ?  | ?    | 1  | 1  | ?  | 0  | 0  | ?  | ?  | 0  |
| <i>Cryptoclidus</i>              | ?  | 0  | 0  | 1  | 0  | 1  | 1  | 0    | 1  | 1  | ?  | 0  | 0  | ?  | 0  | ?  |
|                                  | 81 | 82 | 83 | 84 | 85 | 86 | 87 | 88   | 89 | 90 | 91 | 92 | 93 | 94 | 95 | 96 |
| <i>Yunguisaurus</i>              | ?  | ?  | ?  | 0  | ?  | 1  | 0  | 0    | 0  | ?  | 1  | 1  | 0  | 0  | 1  | ?  |
| <i>Pistosaurus</i> [postcranium] | ?  | ?  | ?  | ?  | ?  | ?  | ?  | ?    | ?  | ?  | ?  | ?  | ?  | ?  | ?  | ?  |
| <i>Pistosaurus</i> [skull]       | 0  | ?  | ?  | 2  | 0  | ?  | ?  | ?    | ?  | ?  | ?  | ?  | ?  | ?  | ?  | ?  |
| <i>Augustasaurus</i>             | 0  | ?  | ?  | 0  | 0  | 1  | 0  | 0    | 0  | ?  | 1  | 1  | 0  | 0  | 1  | ?  |
| <i>Bobosaurus</i>                | ?  | ?  | ?  | ?  | ?  | ?  | ?  | ?    | ?  | ?  | ?  | ?  | ?  | ?  | ?  | ?  |
| NHMUK_49202                      | 0  | 1  | 1  | ?  | 1  | 1  | 0  | 1    | 0  | ?  | 1  | 1  | 0  | 1  | 0  | ?  |
| <i>Stratesaurus</i>              | 0  | 0  | 0  | 2  | ?  | 1  | 0  | 1    | ?  | ?  | 1  | 1  | 1  | 1  | 0  | 0  |
| <i>Macroplata</i>                | ?  | ?  | ?  | ?  | 0  | 1  | 0  | 1    | 1  | ?  | ?  | 2  | 1  | ?  | ?  | ?  |
| <i>Avalonnectes</i>              | ?  | ?  | ?  | ?  | 2  | ?  | ?  | ?    | ?  | ?  | ?  | ?  | ?  | ?  | ?  | ?  |
| <i>Eurycleidus</i>               | ?  | ?  | ?  | ?  | ?  | ?  | 0  | 1    | 1  | ?  | ?  | ?  | ?  | ?  | ?  | ?  |
| <i>Meyerasaurus</i>              | 1  | 0  | 1  | 1  | ?  | 0  | 0  | 1    | 1  | ?  | 0  | 2  | 1  | 1  | 0  | 2  |
| <i>Maresaurus</i>                | 1  | ?  | ?  | 2  | 1  | 0  | 0  | 1    | 1  | ?  | 0  | 2  | 1  | 0  | 0  | ?  |
| 'R.' megacephalus                | 1  | 0  | 0  | 2  | 0  | 0  | 0  | 1    | 1  | ?  | ?  | 2  | 0  | ?  | 0  | ?  |
| <i>Archaeonectrus</i>            | ?  | ?  | ?  | ?  | ?  | ?  | 0  | 1    | ?  | ?  | 1  | ?  | 1  | ?  | ?  | ?  |
| <i>R. cramptoni</i>              | 1  | 0  | 0  | 2  | ?  | 0  | ?  | 1    | 1  | ?  | 0  | 2  | 1  | 0  | 0  | ?  |
| <i>R. zetlandicus</i>            | ?  | 0  | ?  | 2  | 0  | 0  | 0  | 1    | 1  | 1  | 0  | 2  | 1  | 0  | 0  | 2  |
| <i>R. thorntoni</i>              | 1  | ?  | ?  | 2  | ?  | 0  | 0  | 1    | 1  | 1  | ?  | 1  | 1  | ?  | ?  | ?  |
| <i>Thalassiodracon</i>           | 1  | ?  | ?  | 0  | 1  | 1  | 0  | 1    | 0  | 1  | 1  | 1  | 0  | 0  | 0  | 0  |
| <i>H. longirostris</i>           | ?  | ?  | ?  | ?  | ?  | 1  | 1  | 0    | 1  | 1  | 1  | 1  | 1  | 0  | 0  | ?  |
| <i>H. tomistomimus</i>           | 1  | ?  | ?  | ?  | ?  | 1  | 1  | 0    | 0  | 1  | 1  | 1  | 1  | 0  | 0  | ?  |
| <i>H. zanoni</i>                 | 1  | ?  | ?  | 2  | ?  | 1  | 1  | 0    | ?  | ?  | 1  | 1  | 1  | 0  | 0  | ?  |
| <i>Attenborosaurus</i>           | ?  | ?  | ?  | ?  | ?  | 0  | 0  | 1    | 0  | ?  | ?  | ?  | 0  | ?  | ?  | ?  |
| <i>Peloneustes</i>               | 1  | ?  | ?  | 2  | ?  | 1  | 1  | 1    | 1  | 1  | 1  | 0  | 0  | 0  | 0  | 1  |
| <i>Eoplesiosaurus</i>            | ?  | ?  | ?  | ?  | ?  | ?  | ?  | ?    | ?  | ?  | ?  | ?  | ?  | ?  | ?  | ?  |
| <i>Plesiosaurus</i>              | 1  | 1  | 1  | 0  | 2  | 0  | 0  | 0    | 0  | ?  | 1  | 1  | 0  | 0  | 0  | ?  |
| <i>Eretmosaurus</i>              | ?  | ?  | ?  | ?  | ?  | ?  | ?  | ?    | ?  | ?  | ?  | ?  | ?  | ?  | ?  | ?  |
| <i>Westphaliasaurus</i>          | ?  | ?  | ?  | ?  | ?  | ?  | ?  | ?    | ?  | ?  | ?  | ?  | ?  | ?  | ?  | ?  |
| <i>Seelyosaurus</i>              | ?  | ?  | ?  | ?  | ?  | ?  | 0  | 0    | ?  | ?  | 1  | 1  | 0  | 1  | 0  | ?  |
| <i>M. tournemirensis</i>         | ?  | ?  | ?  | 2  | ?  | ?  | ?  | ?    | ?  | ?  | ?  | ?  | ?  | ?  | ?  | ?  |
| <i>M. brachypterygius</i>        | 0  | ?  | ?  | 2  | ?  | ?  | ?  | ?    | ?  | ?  | ?  | ?  | ?  | ?  | ?  | ?  |
| <i>M. homalospondylus</i>        | 0  | ?  | ?  | 2  | 2  | 0  | 0  | 0    | 0  | ?  | ?  | ?  | 0  | ?  | ?  | ?  |
| <i>Plesiospterys</i>             | 0  | 1  | 0  | ?  | 1  | ?  | 2  | 0    | ?  | ?  | 1  | 1  | 0  | 0  | 0  | ?  |
| <i>Cryptoclidus</i>              | 0  | ?  | 0  | 0  | ?  | 0  | 2  | 0    | 0  | 2  | 1  | 1  | 0  | 0  | 0  | ?  |

|                                  | 97   | 98  | 99   | 100 | 101 | 102 | 103  | 104 | 105 | 106 | 107  | 108 | 109  | 110 | 111 | 112 |   |
|----------------------------------|------|-----|------|-----|-----|-----|------|-----|-----|-----|------|-----|------|-----|-----|-----|---|
| <i>Yunguisaurus</i>              | 1    | ?   | ?    | 0   | 0   | 1   | 3    | ?   | ?   | ?   | ?    | ?   | 0    | ?   | ?   | ?   |   |
| <i>Pistosaurus</i> [postcranium] | ?    | ?   | ?    | ?   | ?   | ?   | ?    | ?   | ?   | ?   | ?    | ?   | ?    | ?   | ?   | ?   |   |
| <i>Pistosaurus</i> [skull]       | ?    | ?   | ?    | ?   | ?   | ?   | {12} | 0   | 1   | ?   | ?    | 0   | ?    | ?   | ?   | ?   |   |
| <i>Augustasaurus</i>             | ?    | 0   | ?    | ?   | ?   | 0   | 1    | 0   | 1   | 0   | 2    | 1   | 0    | ?   | 0   | 0   |   |
| <i>Bobosaurus</i>                | ?    | ?   | ?    | ?   | ?   | ?   | ?    | ?   | ?   | 0   | 2    | ?   | ?    | 0   | 0   | 0   |   |
| NHMUK_49202                      | 1    | 0   | 0    | ?   | ?   | 0   | 0    | 0   | 1   | 1   | 1    | 0   | 0    | 0   | 0   | 0   |   |
| <i>Stratesaurus</i>              | 1    | ?   | 0    | 0   | 0   | 0   | 1    | 0   | 0   | 1   | 1    | 0   | 0    | 0   | 0   | 0   |   |
| <i>Macroplata</i>                | 1    | 0   | ?    | ?   | ?   | 0   | 2    | 0   | 1   | 1   | 1    | 1   | 0    | 0   | 0   | 0   |   |
| <i>Avalonnectes</i>              | ?    | ?   | ?    | ?   | 0   | ?   | ?    | ?   | ?   | ?   | ?    | ?   | ?    | ?   | ?   | ?   |   |
| <i>Eurycleidus</i>               | 1    | ?   | ?    | ?   | ?   | ?   | ?    | ?   | ?   | 1   | 1    | 1   | ?    | ?   | ?   | ?   |   |
| <i>Meyerasaurus</i>              | 1    | 0   | ?    | 0   | 0   | 0   | 1    | ?   | 1   | 1   | 0    | 1   | ?    | ?   | ?   | 0   |   |
| <i>Maresaurus</i>                | 1    | 0   | ?    | 0   | 0   | 0   | 1    | ?   | 1   | 1   | 1    | 1   | 0    | ?   | ?   | 0   |   |
| 'R.' megacephalus                | 1    | 0   | ?    | ?   | ?   | ?   | ?    | 0   | 0   | 1   | 0    | 2   | ?    | ?   | ?   | 0   |   |
| <i>Archaeonectrus</i>            | ?    | ?   | ?    | ?   | ?   | ?   | ?    | ?   | ?   | 1   | 1    | 2   | ?    | ?   | ?   | ?   |   |
| <i>R. cramptoni</i>              | 1    | 0   | ?    | 0   | 0   | 0   | 1    | ?   | 1   | 1   | 0    | 2   | ?    | 0   | ?   | ?   |   |
| <i>R. zetlandicus</i>            | 1    | 0   | 0    | 0   | 0   | 0   | ?    | ?   | 1   | 1   | 0    | 2   | ?    | ?   | ?   | ?   |   |
| <i>R. thorntoni</i>              | 1    | 0   | 0    | 0   | 0   | ?   | 1    | 1   | 1   | 1   | 0    | 1   | 0    | ?   | ?   | ?   |   |
| <i>Thalassiodracon</i>           | ?    | 0   | 2    | 0   | 0   | ?   | 0    | 0   | 1   | 1   | 1    | 1   | 0    | 0   | 0   | 0   |   |
| <i>H. longirostris</i>           | 1    | 0   | ?    | ?   | ?   | 2   | 3    | 0   | 1   | 1   | 1    | 2   | 0    | ?   | ?   | ?   |   |
| <i>H. tomistomimus</i>           | 1    | 0   | 2    | ?   | ?   | 2   | 3    | 0   | 1   | 1   | 1    | 2   | ?    | 1   | 0   | ?   |   |
| <i>H. zanoni</i>                 | ?    | 0   | 2    | ?   | ?   | 2   | 3    | 0   | 1   | 1   | 1    | 2   | 0    | 0   | 0   | 0   |   |
| <i>Attenborosaurus</i>           | ?    | ?   | ?    | ?   | ?   | ?   | 1    | 0   | 1   | ?   | ?    | ?   | ?    | ?   | ?   | ?   |   |
| <i>Peloneustes</i>               | 1    | 0   | 1    | 1   | ?   | 0   | 2    | 1   | 1   | 1   | 0    | 2   | 0    | 1   | 0   | 0   |   |
| <i>Eoplesiosaurus</i>            | ?    | ?   | ?    | ?   | ?   | ?   | ?    | ?   | ?   | ?   | ?    | ?   | ?    | ?   | ?   | ?   |   |
| <i>Plesiosaurus</i>              | ?    | ?   | ?    | ?   | ?   | ?   | 1    | 0   | 0   | 1   | 1    | 1   | ?    | ?   | ?   | 0   |   |
| <i>Eretmosaurus</i>              | ?    | ?   | ?    | ?   | ?   | ?   | ?    | ?   | ?   | ?   | ?    | ?   | ?    | ?   | ?   | ?   |   |
| <i>Westphaliasaurus</i>          | ?    | ?   | ?    | ?   | ?   | ?   | ?    | ?   | ?   | ?   | ?    | ?   | ?    | ?   | ?   | ?   |   |
| <i>Seelyosaurus</i>              | ?    | ?   | ?    | ?   | ?   | ?   | 1    | 0   | 0   | 1   | 1    | 0   | ?    | ?   | ?   | ?   |   |
| <i>M. tournemirensis</i>         | ?    | ?   | ?    | ?   | ?   | ?   | 1    | 1   | 0   | 1   | 1    | 0   | 1    | ?   | ?   | ?   |   |
| <i>M. brachypterygius</i>        | ?    | ?   | ?    | ?   | ?   | ?   | ?    | 0   | 0   | 1   | 1    | 0   | 1    | ?   | ?   | ?   |   |
| <i>M. homalospondylus</i>        | 1    | 1   | 2    | 0   | 1   | ?   | 1    | 0   | 0   | ?   | ?    | 0   | 1    | ?   | ?   | ?   |   |
| <i>Plesiospterys</i>             | 0    | ?   | 2    | 0   | ?   | 0   | ?    | 0   | 0   | 1   | 1    | 1   | ?    | ?   | ?   | ?   |   |
| <i>Cryptoclidus</i>              | 0    | 1   | 2    | 0   | 1   | 0   | 2    | 0   | 0   | 1   | 1    | 1   | 1    | 1   | 1   | 1   |   |
|                                  | 113  | 114 | 115  | 116 | 117 | 118 | 119  | 120 | 121 | 122 | 123  | 124 | 125  | 126 | 127 | 128 |   |
| <i>Yunguisaurus</i>              | ?    | ?   | 2    | 0   | 0   | 0   | ?    | ?   | 0   | 0   | ?    | 0   | 0    | 0   | 0   | 0   |   |
| <i>Pistosaurus</i> [postcranium] | ?    | ?   | ?    | 1   | 0   | 0   | 1    | 1   | 0   | 0   | 0    | 0   | 0    | 0   | 0   | 0   |   |
| <i>Pistosaurus</i> [skull]       | ?    | ?   | ?    | ?   | ?   | ?   | ?    | ?   | ?   | ?   | ?    | ?   | ?    | ?   | ?   | ?   |   |
| <i>Augustasaurus</i>             | 2    | ?   | 2    | 0   | ?   | ?   | ?    | ?   | 0   | 0   | 0    | 0   | 0    | 2   | 0   | 0   |   |
| <i>Bobosaurus</i>                | 0    | ?   | 3    | 2   | 0   | 0   | 0    | ?   | ?   | 1   | 1    | ?   | 1    | 2   | ?   | 0   |   |
| NHMUK_49202                      | 0    | 0   | ?    | 0   | 0   | 0   | 0    | ?   | ?   | 2   | ?    | ?   | 1    | 2   | 0   | 1   |   |
| <i>Stratesaurus</i>              | 2    | 0   | ?    | 0   | 0   | 0   | 0    | 0   | 1   | 1   | 1    | 0   | 1    | 2   | 0   | 1   |   |
| <i>Macroplata</i>                | 2    | 0   | 1    | 2   | 0   | 0   | ?    | ?   | ?   | 1   | 1    | ?   | 1    | 2   | 0   | 1   |   |
| <i>Avalonnectes</i>              | ?    | ?   | 1    | 0   | 0   | 0   | 0    | 0   | 2   | 1   | 1    | 0   | 1    | ?   | ?   | 1   |   |
| <i>Eurycleidus</i>               | ?    | ?   | ?    | 0   | 0   | 0   | 0    | 0   | 2   | 1   | 1    | 0   | 0    | 2   | 0   | 1   |   |
| <i>Meyerasaurus</i>              | ?    | ?   | 1    | 2   | 0   | ?   | ?    | ?   | ?   | ?   | ?    | 0   | ?    | 2   | 0   | ?   |   |
| <i>Maresaurus</i>                | ?    | ?   | ?    | 2   | ?   | 0   | ?    | ?   | ?   | 1   | ?    | ?   | {01} | ?   | ?   | 1   |   |
| 'R.' megacephalus                | ?    | 0   | 1    | 2   | 0   | 0   | ?    | ?   | ?   | 1   | 1    | ?   | ?    | 2   | 0   | 1   |   |
| <i>Archaeonectrus</i>            | ?    | ?   | 1    | 0   | 0   | 0   | 0    | 0   | 1   | 1   | 1    | 0   | 0    | 2   | 0   | 1   |   |
| <i>R. cramptoni</i>              | ?    | ?   | 1    | 2   | ?   | 0   | ?    | 1   | 2   | 1   | 1    | 0   | 0    | ?   | ?   | 1   |   |
| <i>R. zetlandicus</i>            | ?    | ?   | 1    | 2   | ?   | 0   | 0    | ?   | ?   | 1   | 1    | ?   | 0    | 2   | 0   | 1   |   |
| <i>R. thorntoni</i>              | ?    | ?   | ?    | 2   | 0   | 0   | ?    | ?   | ?   | 1   | 1    | ?   | 0    | 0   | 0   | 1   |   |
| <i>Thalassiodracon</i>           | 2    | 0   | 0    | 0   | 0   | 0   | 0    | 0   | 1   | 1   | 1    | 0   | 1    | 2   | 0   | 1   |   |
| <i>H. longirostris</i>           | ?    | ?   | ?    | ?   | ?   | ?   | ?    | ?   | ?   | ?   | ?    | ?   | ?    | ?   | ?   | ?   |   |
| <i>H. tomistomimus</i>           | {02} | 1   | 0    | 0   | 0   | 0   | ?    | 1   | 1   | 1   | 1    | ?   | 1    | 0   | 0   | 1   |   |
| <i>H. zanoni</i>                 | ?    | ?   | 0    | 0   | 0   | 0   | 1    | ?   | 1   | 1   | 1    | 0   | 1    | 0   | 0   | 1   |   |
| <i>Attenborosaurus</i>           | ?    | ?   | 0    | 0   | ?   | 0   | 0    | 1   | 1   | 1   | 1    | ?   | ?    | ?   | ?   | 1   |   |
| <i>Peloneustes</i>               | 2    | ?   | 3    | 2   | 1   | 0   | 1    | 1   | 2   | 1   | 2    | 1   | 1    | 1   | 0   | 1   |   |
| <i>Eoplesiosaurus</i>            | ?    | ?   | 2    | 0   | ?   | 0   | 0    | 1   | 1   | 1   | ?    | ?   | 1    | 2   | ?   | 1   |   |
| <i>Plesiosaurus</i>              | ?    | 0   | 2    | 0   | 0   | 0   | 0    | 1   | 2   | 1   | {01} | 0   | 1    | 0   | 0   | 1   |   |
| <i>Eretmosaurus</i>              | ?    | ?   | {02} | 0   | 0   | 0   | 1    | 0   | ?   | 1   | 0    | ?   | ?    | 1   | 2   | 0   | 1 |
| <i>Westphaliasaurus</i>          | ?    | ?   | {02} | ?   | 0   | 0   | 1    | 0   | 2   | 1   | ?    | ?   | ?    | 0   | 0   | 1   |   |
| <i>Seelyosaurus</i>              | ?    | ?   | 0    | 0   | 0   | 0   | 1    | 2   | 2   | 1   | 0    | 0   | ?    | ?   | ?   | 1   |   |
| <i>M. tournemirensis</i>         | ?    | ?   | 2    | 1   | 0   | 1   | 1    | 1   | 2   | 1   | 0    | ?   | 2    | 0   | ?   | 1   |   |
| <i>M. brachypterygius</i>        | ?    | ?   | 0    | 1   | ?   | 1   | 1    | 1   | 2   | 1   | ?    | 0   | ?    | ?   | 1   | ?   |   |
| <i>M. homalospondylus</i>        | ?    | ?   | 2    | 1   | 1   | 1   | 1    | 1   | 2   | 1   | 0    | 0   | 2    | 0   | 1   | 1   |   |
| <i>Plesiospterys</i>             | ?    | 0   | 2    | 1   | ?   | 0   | 1    | 1   | 2   | 1   | 1    | 2   | ?    | 0   | 0   | 1   |   |
| <i>Cryptoclidus</i>              | 1    | 0   | 0    | 0   | 0   | 0   | 1    | 1   | 2   | 2   | 2    | 2   | 1    | 0   | 0   | 1   |   |

|                                  | 129 | 130 | 131 | 132  | 133  | 134 | 135 | 136 | 137 | 138  | 139  | 140 | 141 | 142 | 143 | 144 |
|----------------------------------|-----|-----|-----|------|------|-----|-----|-----|-----|------|------|-----|-----|-----|-----|-----|
| <i>Yunguisaurus</i>              | ?   | 0   | 1   | ?    | ?    | ?   | ?   | 0   | 1   | 2    | 1    | 0   | ?   | 0   | ?   | ?   |
| <i>Pistosaurus</i> [postcranium] | 0   | 0   | 1   | 0    | 1    | 0   | 1   | 0   | 1   | 1    | 0    | 0   | 0   | 1   | 0   | 0   |
| <i>Pistosaurus</i> [skull]       | ?   | ?   | ?   | ?    | ?    | ?   | ?   | ?   | ?   | ?    | ?    | ?   | ?   | ?   | ?   | ?   |
| <i>Augustasaurus</i>             | ?   | 0   | 1   | 0    | 0    | 0   | 0   | 1   | 1   | ?    | ?    | 0   | 0   | 0   | 0   | 0   |
| <i>Bobosaurus</i>                | 0   | 0   | 0   | 0    | ?    | 0   | 0   | 1   | 2   | 2    | 1    | 1   | 0   | 0   | ?   | ?   |
| NHMUK_49202                      | 0   | 0   | 0   | 3    | 1    | 1   | ?   | ?   | ?   | ?    | ?    | ?   | ?   | ?   | ?   | ?   |
| <i>Stratesaurus</i>              | 0   | 0   | 0   | 3    | 1    | 1   | ?   | ?   | 1   | ?    | ?    | ?   | ?   | 0   | ?   | 0   |
| <i>Macroplata</i>                | 0   | 0   | ?   | 3    | 0    | 0   | 0   | 1   | ?   | 1    | 1    | 1   | 0   | 0   | 0   | 0   |
| <i>Avalonnectes</i>              | 0   | 0   | 0   | 1    | 1    | 0   | 0   | 1   | 1   | 0    | 1    | 1   | 0   | 1   | 1   | 2   |
| <i>Eurycleidus</i>               | 0   | 0   | 0   | 1    | 0    | 0   | 0   | ?   | 1   | ?    | 1    | 1   | 0   | 1   | 1   | ?   |
| <i>Meyerasaurus</i>              | ?   | ?   | 0   | ?    | ?    | 0   | 0   | 1   | 1   | 2    | 1    | 1   | 0   | 1   | 1   | 2   |
| <i>Maresaurus</i>                | ?   | ?   | 0   | 3    | 0    | ?   | ?   | ?   | ?   | ?    | ?    | ?   | ?   | ?   | ?   | ?   |
| 'R.' megacephalus                | ?   | ?   | ?   | 1    | 0    | 0   | 0   | 1   | 1   | 1    | ?    | 1   | 0   | 1   | 1   | 2   |
| <i>Archaeonectrus</i>            | ?   | ?   | 0   | ?    | 1    | ?   | 0   | 1   | 1   | 1    | 1    | 1   | 0   | 1   | 0   | 1   |
| <i>R. cramptoni</i>              | ?   | 0   | 0   | 1    | ?    | ?   | 0   | 0   | 0   | 2    | 1    | 1   | 0   | ?   | 0   | 1   |
| <i>R. zetlandicus</i>            | 0   | 0   | 0   | 1    | 0    | 0   | 0   | ?   | ?   | 2    | 1    | 1   | 0   | ?   | 0   | 1   |
| <i>R. thorntoni</i>              | 0   | 0   | ?   | 1    | 0    | ?   | 0   | 1   | ?   | 2    | 1    | 1   | 0   | 1   | ?   | ?   |
| <i>Thalassiodracon</i>           | 0   | 0   | 0   | 2    | 1    | 0   | 0   | 1   | 1   | 1    | 0    | 1   | 0   | 0   | 0   | 0   |
| <i>H. longirostris</i>           | ?   | ?   | ?   | ?    | ?    | ?   | ?   | ?   | ?   | ?    | ?    | ?   | ?   | ?   | ?   | ?   |
| <i>H. tomistomimus</i>           | 0   | 0   | 0   | 2    | 0    | 0   | 0   | 1   | 1   | 1    | 0    | 1   | 0   | 1   | 0   | 0   |
| <i>H. zanoni</i>                 | 0   | 0   | 0   | 2    | 0    | 0   | 0   | ?   | ?   | ?    | ?    | ?   | ?   | ?   | ?   | ?   |
| <i>Attenborosaurus</i>           | ?   | ?   | 0   | {03} | 0    | ?   | ?   | 1   | 1   | 1    | 0    | 1   | 1   | 0   | 0   | 0   |
| <i>Peloneustes</i>               | 0   | 0   | 0   | 0    | 0    | 1   | 0   | 0   | 1   | 1    | 1    | 1   | 1   | 0   | 0   | 0   |
| <i>Eoplesiosaurus</i>            | ?   | ?   | 0   | 3    | ?    | 0   | ?   | ?   | ?   | ?    | ?    | ?   | ?   | ?   | ?   | ?   |
| <i>Plesiosaurus</i>              | 1   | 1   | 0   | 3    | {01} | 0   | 0   | 1   | 1   | {01} | 1    | 1   | 1   | 0   | 0   | 0   |
| <i>Eretmosaurus</i>              | 0   | 0   | 0   | ?    | 0    | 0   | 1   | 1   | 1   | ?    | ?    | 1   | 1   | ?   | 0   | 0   |
| <i>Westphaliasaurus</i>          | 0   | ?   | 0   | 3    | 1    | 0   | 0   | 1   | 1   | 1    | ?    | 1   | ?   | 0   | 0   | 0   |
| <i>Seelyosaurus</i>              | ?   | ?   | 0   | 0    | ?    | 0   | ?   | 1   | 2   | 0    | 0    | 1   | 1   | 0   | 0   | 0   |
| <i>M.tournemirensis</i>          | 0   | 0   | 0   | 0    | 1    | 0   | 1   | 1   | 2   | 0    | 0    | 1   | 1   | 1   | 0   | 0   |
| <i>M. brachypterygius</i>        | ?   | ?   | 0   | 0    | 1    | 0   | ?   | 1   | 2   | 0    | 1    | 1   | 1   | 1   | 0   | 0   |
| <i>M. homalospondylus</i>        | 0   | 0   | 0   | 0    | 1    | 0   | 1   | 1   | 2   | 0    | 1    | 1   | 1   | 1   | 0   | 0   |
| <i>Plesiospterys</i>             | ?   | ?   | 0   | 0    | 1    | 0   | 1   | 1   | 1   | 1    | {01} | 1   | 1   | 0   | ?   | 0   |
| <i>Cryptoclidus</i>              | 2   | 1   | 0   | 0    | 0    | 0   | 0   | 1   | 1   | 1    | 0    | 1   | 1   | 0   | 0   | 0   |

  

|                                  | 145 | 146 | 147 | 148 | 149 | 150 | 151 | 152 | 153  | 154 | 155 | 156 | 157 | 158 | 159 | 160 |
|----------------------------------|-----|-----|-----|-----|-----|-----|-----|-----|------|-----|-----|-----|-----|-----|-----|-----|
| <i>Yunguisaurus</i>              | 0   | 0   | 0   | ?   | ?   | ?   | 0   | ?   | ?    | ?   | 0   | ?   | 0   | 0   | 0   | ?   |
| <i>Pistosaurus</i> [postcranium] | ?   | ?   | ?   | ?   | ?   | 2   | 0   | 1   | 0    | 0   | 0   | ?   | 0   | 0   | 1   | ?   |
| <i>Pistosaurus</i> [skull]       | ?   | ?   | ?   | ?   | ?   | ?   | ?   | ?   | ?    | ?   | ?   | ?   | ?   | ?   | ?   | ?   |
| <i>Augustasaurus</i>             | ?   | ?   | ?   | ?   | ?   | ?   | ?   | ?   | ?    | 0   | 0   | ?   | 0   | 0   | 0   | ?   |
| <i>Bobosaurus</i>                | 0   | 1   | 0   | 1   | 1   | ?   | 0   | ?   | ?    | ?   | ?   | ?   | ?   | ?   | ?   | ?   |
| NHMUK_49202                      | ?   | ?   | ?   | ?   | ?   | ?   | ?   | ?   | ?    | ?   | ?   | ?   | ?   | ?   | ?   | ?   |
| <i>Stratesaurus</i>              | ?   | ?   | ?   | ?   | ?   | ?   | ?   | ?   | ?    | ?   | ?   | ?   | 1   | ?   | ?   | ?   |
| <i>Macroplata</i>                | 0   | 0   | 0   | ?   | 0   | 2   | 1   | 0   | 0    | 1   | 0   | 1   | 1   | 0   | ?   | 1   |
| <i>Avalonnectes</i>              | ?   | 0   | 0   | ?   | 0   | 2   | 1   | 0   | 0    | ?   | ?   | ?   | 1   | ?   | 0   | 1   |
| <i>Eurycleidus</i>               | ?   | ?   | ?   | ?   | 0   | 2   | 1   | 0   | 0    | 1   | 0   | 1   | 1   | 0   | 1   | 1   |
| <i>Meyerasaurus</i>              | 0   | 0   | 0   | 1   | ?   | 2   | 1   | 0   | ?    | 0   | 1   | 1   | ?   | 0   | ?   | 1   |
| <i>Maresaurus</i>                | ?   | ?   | ?   | ?   | ?   | ?   | ?   | ?   | ?    | ?   | ?   | ?   | ?   | ?   | ?   | ?   |
| 'R.' megacephalus                | 0   | 0   | 0   | 0   | ?   | 2   | 0   | ?   | ?    | ?   | ?   | ?   | ?   | ?   | ?   | ?   |
| <i>Archaeonectrus</i>            | 0   | 0   | 0   | 0   | 0   | ?   | ?   | ?   | ?    | ?   | ?   | ?   | ?   | ?   | 0   | ?   |
| <i>R. cramptoni</i>              | 0   | 0   | 0   | ?   | 0   | ?   | ?   | 0   | ?    | ?   | ?   | ?   | 1   | ?   | ?   | ?   |
| <i>R. zetlandicus</i>            | ?   | ?   | ?   | ?   | 0   | 2   | 2   | 0   | 0    | ?   | ?   | ?   | ?   | ?   | ?   | ?   |
| <i>R. thorntoni</i>              | ?   | 0   | 0   | ?   | 0   | 2   | 1   | 0   | 0    | ?   | 0   | 1   | 1   | 0   | 0   | 1   |
| <i>Thalassiodracon</i>           | 0   | 0   | 0   | 0   | 0   | 2   | 1   | 0   | 0    | 1   | 0   | 1   | 1   | 0   | 1   | 1   |
| <i>H. longirostris</i>           | ?   | ?   | ?   | ?   | ?   | ?   | ?   | ?   | ?    | ?   | ?   | ?   | ?   | ?   | ?   | ?   |
| <i>H. tomistomimus</i>           | 1   | 0   | 0   | 0   | ?   | ?   | 1   | ?   | ?    | ?   | ?   | ?   | 1   | ?   | ?   | 1   |
| <i>H. zanoni</i>                 | ?   | ?   | 0   | ?   | 0   | 2   | 1   | 0   | 0    | 1   | 0   | 1   | 1   | 0   | 1   | 1   |
| <i>Attenborosaurus</i>           | 1   | ?   | 0   | ?   | ?   | ?   | 1   | ?   | 1    | 1   | 0   | ?   | 1   | 0   | ?   | 1   |
| <i>Peloneustes</i>               | ?   | ?   | 1   | ?   | 0   | 1   | 1   | 0   | 1    | 0   | 0   | ?   | 1   | 0   | 1   | 1   |
| <i>Eoplesiosaurus</i>            | ?   | ?   | 0   | 0   | 0   | 0   | 0   | 1   | ?    | 1   | ?   | ?   | 1   | 0   | 0   | 1   |
| <i>Plesiosaurus</i>              | 0   | 0   | 0   | 0   | 0   | 0   | 0   | 0   | {01} | 1   | 1   | 1   | 1   | 0   | 1   | 1   |
| <i>Eretmosaurus</i>              | ?   | ?   | ?   | ?   | 0   | 0   | 0   | 0   | 1    | ?   | ?   | ?   | 1   | ?   | ?   | ?   |
| <i>Westphaliasaurus</i>          | 0   | 1   | 0   | ?   | 0   | 0   | 0   | 0   | 1    | 1   | 1   | 1   | 1   | 0   | 0   | 1   |
| <i>Seelyosaurus</i>              | 1   | 1   | 0   | 2   | 1   | 0   | 0   | 1   | 1    | 0   | 1   | 0   | 1   | 0   | 0   | 1   |
| <i>M.tournemirensis</i>          | 0   | 1   | 0   | ?   | ?   | ?   | ?   | ?   | ?    | 1   | 0   | 1   | 1   | 0   | 0   | 1   |
| <i>M. brachypterygius</i>        | ?   | ?   | 0   | 2   | 1   | 0   | 0   | 1   | ?    | 1   | 1   | 0   | ?   | ?   | ?   | 1   |
| <i>M. homalospondylus</i>        | 0   | 1   | 0   | ?   | 1   | 0   | 0   | 1   | 1    | 1   | 1   | 0   | 1   | 1   | 1   | 1   |
| <i>Plesiospterys</i>             | 0   | 0   | 0   | 2   | 0   | 0   | 0   | 0   | ?    | 1   | ?   | 1   | 1   | ?   | 0   | 1   |
| <i>Cryptoclidus</i>              | 0   | 0   | 0   | ?   | 0   | 0   | 1   | 0   | 1    | 1   | 1   | 0   | 1   | 1   | 0   | 0   |

|                                  | 161 | 162 | 163  | 164 | 165 | 166 | 167 | 168 | 169 | 170  | 171 | 172 | 173 | 174 | 175 | 176 |
|----------------------------------|-----|-----|------|-----|-----|-----|-----|-----|-----|------|-----|-----|-----|-----|-----|-----|
| <i>Yunguisaurus</i>              | 2   | ?   | ?    | ?   | ?   | ?   | ?   | ?   | ?   | ?    | 0   | 0   | 1   | 2   | 0   | 0   |
| <i>Pistosaurus</i> [postcranium] | 2   | 1   | 0    | 0   | ?   | ?   | ?   | 0   | 1   | ?    | ?   | 0   | 1   | 2   | 0   | 2   |
| <i>Pistosaurus</i> [skull]       | ?   | ?   | ?    | ?   | ?   | ?   | ?   | ?   | ?   | ?    | ?   | ?   | ?   | ?   | ?   | ?   |
| <i>Augustasaurus</i>             | 1   | ?   | 0    | 2   | 0   | 0   | 0   | 0   | ?   | ?    | ?   | ?   | ?   | ?   | ?   | ?   |
| <i>Bobosaurus</i>                | ?   | ?   | ?    | ?   | ?   | ?   | ?   | ?   | ?   | ?    | ?   | 0   | 1   | 2   | 0   | 0   |
| NHMUK_49202                      | ?   | ?   | ?    | ?   | ?   | ?   | ?   | ?   | ?   | ?    | ?   | ?   | ?   | ?   | ?   | ?   |
| <i>Stratesaurus</i>              | ?   | ?   | ?    | ?   | ?   | ?   | ?   | ?   | ?   | ?    | ?   | 0   | 1   | 0   | 0   | 2   |
| <i>Macroplata</i>                | ?   | ?   | 0    | 0   | 0   | 0   | 0   | ?   | 0   | 2    | 0   | 0   | 1   | ?   | 0   | 0   |
| <i>Avalonnectes</i>              | 2   | ?   | ?    | ?   | ?   | ?   | ?   | ?   | ?   | ?    | ?   | 0   | 1   | 0   | 0   | ?   |
| <i>Eurycleidus</i>               | 2   | 1   | 0    | 2   | 0   | 1   | 0   | 1   | 0   | 2    | 0   | 0   | 1   | 0   | 0   | 0   |
| <i>Meyerasaurus</i>              | ?   | ?   | 0    | 2   | 0   | 1   | 0   | ?   | 0   | 0    | 0   | 0   | 1   | 0   | 0   | 0   |
| <i>Maresaurus</i>                | ?   | ?   | ?    | ?   | ?   | ?   | ?   | ?   | ?   | ?    | ?   | ?   | ?   | ?   | ?   | ?   |
| 'R.' megacephalus                | ?   | 1   | ?    | ?   | ?   | ?   | ?   | ?   | ?   | ?    | ?   | 0   | 1   | 0   | 0   | 0   |
| <i>Archaeonectrus</i>            | 2   | 1   | ?    | ?   | ?   | ?   | ?   | ?   | ?   | ?    | ?   | 0   | 1   | ?   | 0   | ?   |
| <i>R. cramptoni</i>              | ?   | ?   | ?    | ?   | ?   | ?   | ?   | 1   | ?   | ?    | ?   | 0   | 1   | 0   | 0   | ?   |
| <i>R. zetlandicus</i>            | ?   | ?   | ?    | ?   | ?   | ?   | ?   | ?   | ?   | ?    | ?   | ?   | ?   | ?   | ?   | ?   |
| <i>R. thorntoni</i>              | 2   | 1   | 0    | ?   | 0   | ?   | 0   | 1   | 0   | 2    | 0   | 0   | 1   | 2   | 0   | 0   |
| <i>Thalassiodracon</i>           | 0   | ?   | 0    | 0   | 0   | 0   | 0   | 1   | 0   | {02} | 0   | 0   | 1   | 0   | 0   | 0   |
| <i>H. longirostris</i>           | ?   | ?   | ?    | ?   | ?   | ?   | ?   | ?   | ?   | ?    | ?   | ?   | ?   | ?   | ?   | ?   |
| <i>H. tomistomimus</i>           | ?   | 0   | ?    | ?   | ?   | ?   | ?   | ?   | ?   | 2    | 0   | ?   | ?   | ?   | ?   | ?   |
| <i>H. zanoni</i>                 | 2   | ?   | 0    | 0   | 2   | 0   | 0   | ?   | 1   | 2    | 0   | 0   | 1   | 0   | 0   | 0   |
| <i>Attenborosaurus</i>           | ?   | ?   | 0    | 2   | 2   | 0   | 0   | ?   | 0   | 3    | 1   | 0   | ?   | 0   | 0   | ?   |
| <i>Peloneustes</i>               | 0   | 0   | 2    | 0   | 2   | 0   | 0   | ?   | ?   | ?    | 1   | 0   | 0   | 2   | 1   | 0   |
| <i>Eoplesiosaurus</i>            | 0   | ?   | 0    | ?   | 0   | ?   | 0   | ?   | ?   | ?    | ?   | 0   | ?   | ?   | 0   | ?   |
| <i>Plesiosaurus</i>              | 0   | 1   | 0    | 0   | 0   | 0   | 0   | ?   | 0   | 0    | 0   | 0   | 0   | 0   | 0   | 0   |
| <i>Eretmosaurus</i>              | ?   | ?   | {02} | ?   | 0   | ?   | 0   | ?   | ?   | ?    | 0   | 0   | 1   | 0   | 0   | 0   |
| <i>Westphaliasaurus</i>          | 2   | ?   | 0    | 0   | 0   | 0   | 0   | 1   | ?   | 2    | 0   | 0   | ?   | ?   | 0   | 0   |
| <i>Seelyosaurus</i>              | 2   | ?   | 2    | 0   | 0   | 3   | ?   | ?   | ?   | 3    | 0   | 0   | ?   | 0   | 0   | ?   |
| <i>M.tournemirensis</i>          | 2   | 1   | 2    | 0   | 1   | 3   | 1   | ?   | 1   | 3    | 0   | 0   | 1   | 2   | 0   | 0   |
| <i>M. brachypterygius</i>        | ?   | ?   | 1    | 0   | 1   | 3   | ?   | ?   | 1   | ?    | 1   | 0   | 1   | 2   | 0   | 0   |
| <i>M. homalospondylus</i>        | 0   | 1   | ?    | 0   | 1   | ?   | 1   | 1   | 1   | ?    | 0   | 0   | 1   | 2   | 0   | 0   |
| <i>Plesiospterys</i>             | 2   | ?   | ?    | 0   | ?   | ?   | ?   | ?   | 1   | 3    | ?   | 0   | 1   | 0   | 0   | 0   |
| <i>Cryptoclidus</i>              | 1   | 0   | 1    | 0   | 1   | 0   | 1   | 2   | 1   | ?    | 1   | 1   | 0   | 0   | 0   | 1   |
|                                  | 177 | 178 | 179  | 180 | 181 | 182 | 183 | 184 | 185 | 186  | 187 | 188 | 189 | 190 | 191 | 192 |
| <i>Yunguisaurus</i>              | 1   | ?   | 0    | 0   | 0   | 0   | 0   | ?   | ?   | ?    | 0   | 0   | ?   | 0   | 2   | ?   |
| <i>Pistosaurus</i> [postcranium] | 0   | ?   | ?    | ?   | 1   | ?   | ?   | 0   | 1   | ?    | 0   | 0   | 0   | 0   | 2   | 0   |
| <i>Pistosaurus</i> [skull]       | ?   | ?   | ?    | ?   | ?   | ?   | ?   | ?   | ?   | ?    | ?   | ?   | ?   | ?   | ?   | ?   |
| <i>Augustasaurus</i>             | ?   | ?   | ?    | ?   | ?   | 0   | 0   | 0   | ?   | ?    | 0   | 0   | 0   | 0   | 2   | 0   |
| <i>Bobosaurus</i>                | 0   | ?   | 0    | 0   | 1   | ?   | ?   | 0   | ?   | ?    | 0   | 0   | 0   | ?   | ?   | ?   |
| NHMUK_49202                      | ?   | ?   | ?    | ?   | ?   | ?   | ?   | ?   | ?   | ?    | ?   | ?   | ?   | ?   | ?   | ?   |
| <i>Stratesaurus</i>              | 1   | 1   | ?    | ?   | ?   | ?   | ?   | ?   | ?   | ?    | ?   | ?   | ?   | ?   | ?   | ?   |
| <i>Macroplata</i>                | 2   | ?   | 0    | 0   | 2   | ?   | ?   | ?   | 1   | 0    | ?   | 0   | ?   | 0   | 2   | ?   |
| <i>Avalonnectes</i>              | 1   | 0   | ?    | ?   | 1   | ?   | ?   | ?   | ?   | 1    | 0   | ?   | ?   | 0   | 2   | ?   |
| <i>Eurycleidus</i>               | 1   | 0   | 0    | 0   | 1   | ?   | ?   | 0   | 1   | 0    | 1   | 1   | 1   | 0   | 0   | 0   |
| <i>Meyerasaurus</i>              | 1   | ?   | 0    | 0   | 1   | 1   | 0   | 0   | ?   | ?    | 1   | 0   | ?   | 0   | 2   | 1   |
| <i>Maresaurus</i>                | ?   | ?   | ?    | ?   | ?   | ?   | ?   | ?   | ?   | ?    | ?   | ?   | ?   | ?   | ?   | ?   |
| 'R.' megacephalus                | 1   | 0   | ?    | ?   | ?   | ?   | ?   | 0   | ?   | ?    | 1   | 0   | 1   | 0   | 0   | ?   |
| <i>Archaeonectrus</i>            | 1   | 0   | 0    | ?   | 1   | 0   | 0   | 0   | ?   | ?    | 1   | 0   | ?   | 0   | ?   | ?   |
| <i>R. cramptoni</i>              | 1   | 0   | 0    | 0   | ?   | 1   | ?   | 0   | ?   | ?    | 1   | 1   | ?   | 0   | 0   | ?   |
| <i>R. zetlandicus</i>            | ?   | ?   | ?    | ?   | ?   | 1   | 0   | 0   | 1   | 2    | 1   | 1   | 0   | 0   | 0   | 1   |
| <i>R. thorntoni</i>              | 1   | 0   | 0    | 0   | 1   | ?   | ?   | 0   | 1   | 1    | 1   | 1   | 0   | 0   | 2   | 1   |
| <i>Thalassiodracon</i>           | 1   | 1   | 0    | 0   | 1   | 1   | 0   | 0   | 0   | 0    | 1   | 0   | 0   | 0   | 2   | 0   |
| <i>H. longirostris</i>           | ?   | ?   | ?    | ?   | ?   | ?   | ?   | ?   | ?   | ?    | ?   | ?   | ?   | ?   | ?   | ?   |
| <i>H. tomistomimus</i>           | ?   | ?   | 0    | 0   | ?   | ?   | 0   | 0   | 0   | 0    | 2   | 0   | 0   | 0   | 0   | 1   |
| <i>H. zanoni</i>                 | 2   | ?   | 0    | 0   | 0   | 1   | 0   | 0   | ?   | ?    | 2   | 0   | ?   | 0   | 0   | 1   |
| <i>Attenborosaurus</i>           | 1   | ?   | 0    | 0   | 1   | 0   | 0   | 0   | ?   | ?    | 1   | 0   | ?   | 0   | ?   | ?   |
| <i>Peloneustes</i>               | 1   | 1   | 1    | 0   | 2   | 0   | 0   | 1   | ?   | ?    | 1   | 1   | 0   | 0   | 0   | 1   |
| <i>Eoplesiosaurus</i>            | ?   | ?   | 0    | 0   | 1   | 1   | 0   | 0   | ?   | ?    | 2   | 0   | 1   | 0   | ?   | ?   |
| <i>Plesiosaurus</i>              | 2   | 1   | 0    | 0   | 1   | 0   | 0   | 0   | ?   | ?    | 1   | 0   | 1   | 0   | 2   | 0   |
| <i>Eretmosaurus</i>              | 2   | 0   | 0    | 0   | 1   | 1   | 0   | 0   | ?   | ?    | 1   | 1   | ?   | 1   | 2   | 0   |
| <i>Westphaliasaurus</i>          | 2   | 0   | 0    | 0   | 1   | ?   | ?   | 0   | 0   | 1    | 1   | 1   | 0   | 0   | 0   | 2   |
| <i>Seelyosaurus</i>              | 2   | 0   | 0    | 0   | 1   | 1   | 0   | 0   | ?   | ?    | 1   | 0   | ?   | 1   | 2   | ?   |
| <i>M.tournemirensis</i>          | 2   | 0   | 0    | 0   | 1   | 1   | ?   | 0   | ?   | ?    | 1   | 0   | ?   | 1   | 2   | ?   |
| <i>M. brachypterygius</i>        | 1   | 0   | ?    | ?   | 0   | 1   | 0   | 0   | ?   | ?    | 1   | 1   | ?   | 1   | 2   | ?   |
| <i>M. homalospondylus</i>        | 2   | 0   | 0    | 0   | 0   | 1   | ?   | 0   | 0   | 0    | 1   | 1   | ?   | 1   | 2   | 0   |
| <i>Plesiospterys</i>             | 2   | ?   | 0    | 0   | 1   | ?   | ?   | 0   | 0   | 0    | 1   | 0   | 0   | 1   | 0   | ?   |
| <i>Cryptoclidus</i>              | 1   | 1   | 0    | 1   | 1   | 1   | 1   | 0   | 1   | 1    | 3   | 2   | 0   | 1   | 0   | 1   |

|                                  | 193 | 194 | 195 | 196 | 197  | 198 | 199 | 200 | 201 | 202 | 203 | 204 | 205 | 206 | 207 |
|----------------------------------|-----|-----|-----|-----|------|-----|-----|-----|-----|-----|-----|-----|-----|-----|-----|
| <i>Yunguisaurus</i>              | ?   | 0   | 0   | 0   | 0    | 0   | 0   | 0   | 0   | 0   | 0   | 0   | 0   | 0   | 0   |
| <i>Pistosaurus</i> [postcranium] | ?   | 0   | ?   | ?   | ?    | 0   | ?   | ?   | 0   | ?   | ?   | ?   | ?   | ?   | 0   |
| <i>Pistosaurus</i> [skull]       | ?   | ?   | ?   | ?   | ?    | ?   | ?   | ?   | ?   | ?   | ?   | ?   | ?   | ?   | ?   |
| <i>Augustasaurus</i>             | ?   | 0   | ?   | 1   | 0    | 0   | ?   | ?   | 0   | 0   | 0   | ?   | 0   | 0   | 0   |
| <i>Bobosaurus</i>                | ?   | ?   | 0   | ?   | ?    | ?   | 0   | ?   | 0   | ?   | ?   | 0   | ?   | ?   | ?   |
| NHMUK_49202                      | ?   | ?   | ?   | ?   | ?    | ?   | ?   | ?   | ?   | ?   | ?   | ?   | ?   | ?   | ?   |
| <i>Stratesaurus</i>              | ?   | ?   | 1   | ?   | ?    | ?   | 0   | 1   | 0   | ?   | ?   | 0   | ?   | 1   | 0   |
| <i>Macrop lata</i>               | 0   | ?   | 1   | ?   | ?    | ?   | 0   | 1   | 0   | ?   | ?   | 0   | ?   | ?   | ?   |
| <i>Avalonnectes</i>              | 0   | 1   | 1   | 0   | ?    | 1   | 0   | 1   | 0   | 0   | 0   | 0   | 1   | 0   | 0   |
| <i>Eurycleidus</i>               | 0   | ?   | ?   | ?   | ?    | 1   | ?   | 1   | 0   | ?   | ?   | ?   | ?   | ?   | 0   |
| <i>Meyerasaurus</i>              | ?   | 1   | 1   | 0   | 1    | 1   | 0   | 1   | 0   | 0   | 0   | 1   | 1   | 0   | 0   |
| <i>Maresaurus</i>                | ?   | ?   | ?   | ?   | ?    | ?   | ?   | ?   | ?   | ?   | ?   | ?   | ?   | ?   | ?   |
| 'R.' <i>megacephalus</i>         | ?   | ?   | 1   | ?   | ?    | 1   | 0   | 1   | 0   | ?   | ?   | 0   | ?   | ?   | 0   |
| <i>Archaeonectrus</i>            | 0   | 1   | 1   | 0   | 1    | 1   | 0   | 1   | 0   | 0   | 0   | 1   | ?   | 0   | 0   |
| <i>R. cramptoni</i>              | ?   | 1   | 1   | 0   | 1    | 1   | 0   | 1   | 0   | 0   | ?   | 1   | ?   | 0   | 0   |
| <i>R. zetlandicus</i>            | 0   | 1   | 1   | 0   | 1    | 1   | 0   | ?   | 0   | 0   | 1   | ?   | 1   | 0   | ?   |
| <i>R. thorn toni</i>             | 0   | ?   | ?   | ?   | ?    | ?   | ?   | ?   | ?   | ?   | ?   | ?   | ?   | ?   | ?   |
| <i>Thalassiodracon</i>           | 0   | 1   | 1   | 0   | 0    | 1   | 0   | 1   | 0   | 0   | 0   | 0   | 1   | 0   | 0   |
| <i>H. longirostris</i>           | ?   | ?   | ?   | ?   | ?    | ?   | ?   | ?   | ?   | ?   | ?   | ?   | ?   | ?   | ?   |
| <i>H. tomistomimus</i>           | 0   | 1   | 1   | 0   | 1    | ?   | 1   | 1   | 0   | ?   | 1   | 1   | 1   | 0   | 0   |
| <i>H. zanoni</i>                 | ?   | 1   | 1   | 0   | 1    | 1   | 0   | 1   | 0   | 0   | 0   | 1   | 1   | 0   | 0   |
| <i>Attenborosaurus</i>           | ?   | 1   | ?   | 0   | 0    | 1   | ?   | ?   | 0   | 0   | ?   | ?   | 1   | 0   | 1   |
| <i>Peloneustes</i>               | 0   | 2   | 2   | 1   | 0    | 1   | 1   | 1   | 0   | 1   | 1   | 1   | 1   | 1   | 1   |
| <i>Eoplesiosaurus</i>            | 0   | 1   | 1   | 0   | ?    | 1   | 0   | 1   | 0   | 0   | 0   | 0   | 1   | 0   | 0   |
| <i>Plesiosaurus</i>              | 0   | 1   | 1   | 0   | {01} | 1   | 0   | 1   | 0   | 0   | 0   | 0   | 1   | 0   | 0   |
| <i>Eretmosaurus</i>              | 0   | 1   | 1   | 0   | 1    | 1   | 0   | 1   | 0   | 0   | 0   | 0   | 1   | 0   | 0   |
| <i>Westphaliasaurus</i>          | 0   | 1   | 1   | 0   | 1    | 1   | 0   | 1   | 0   | 0   | 0   | 1   | ?   | ?   | 1   |
| <i>Seelyosaurus</i>              | 0   | 1   | 1   | 0   | 1    | 1   | 0   | 1   | 0   | 0   | 1   | 1   | 1   | 0   | 1   |
| <i>M. tournemirensis</i>         | 0   | 1   | 1   | 0   | 1    | 1   | 0   | 1   | 0   | 0   | 0   | 1   | ?   | ?   | 1   |
| <i>M. brachypterygius</i>        | ?   | 1   | 1   | 0   | 1    | 0   | 0   | 1   | 0   | 0   | 1   | 1   | 1   | 0   | 1   |
| <i>M. homalospondylus</i>        | 0   | 1   | 1   | 0   | 1    | 1   | 0   | 1   | 0   | 0   | 1   | 1   | 1   | 0   | 1   |
| <i>Plesiospterys</i>             | ?   | 1   | 1   | 0   | 0    | 1   | 0   | 1   | 0   | 0   | 1   | 1   | 1   | 1   | 0   |
| <i>Cryptoclidus</i>              | 1   | 1   | 2   | 0   | 0    | 1   | 1   | 1   | 2   | 2   | 0   | 0   | 2   | 1   | 1   |
